# Supplementary material for: New liquid crystal formation induced by nanoscale phase separation composed of bent-core liquid crystal and rod-like cholesteric liquid crystal mixtures
Source: Royal Society of Chemistry journal article supplement (doi:10.1039/d0sm01748e), 2020-11-12
Supplement: d0sm01748e4.pdf [file d0sm01748e4.pdf]

### Electronic Supporting Information

New LC formation induced by Nano-Scal Phase separation composed of a Bent-core Liquid crystal and Rod-like cholesteric liquid crystal mixtures

Yoichi Takanishi<sup>1</sup>

<sup>1</sup>*Department of Physics, Kyoto University, Kitashirakawaoiwake-cho, Sakyo-ku, Kyoto, 606-8502, Japan*

1. Fig.S1: Binary phase diagram of MLC-6248 and ZLI-2293. Phase transition temperature was mainly determined by texture observation and X-ray diffraction.
2. Fig.S2: Two dimensional small-angle X-ray profiles of ZLI-2293 (mixture A) at room temperature. Scattering at the equatorial direction comes from the edge of a sample cell.
