# Supplementary figures and images for: New liquid crystal formation induced by nanoscale phase separation composed of bent-core liquid crystal and rod-like cholesteric liquid crystal mixtures
Source: Royal Society of Chemistry journal article supplement (doi:10.1039/d0sm01748e), 2020-11-12

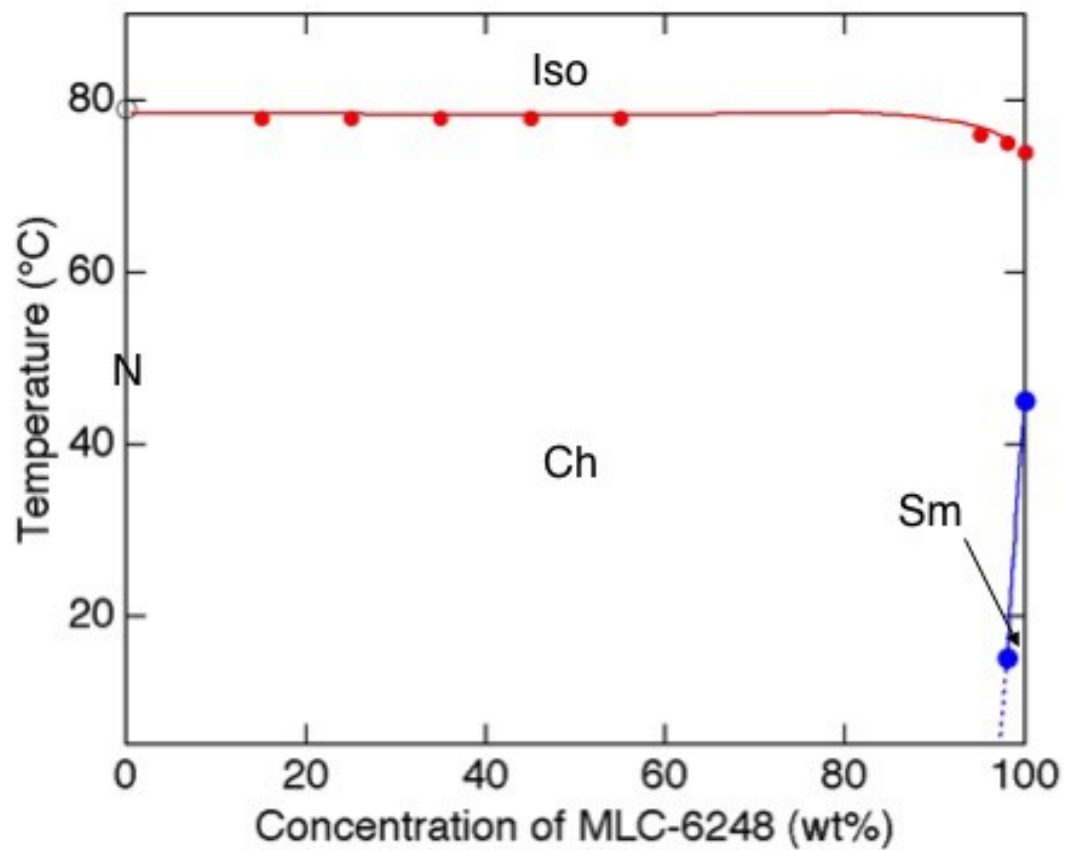

Fig. S1: Y. Takanishi

Supplement: d0sm01748e2.pdf [file d0sm01748e2.pdf]

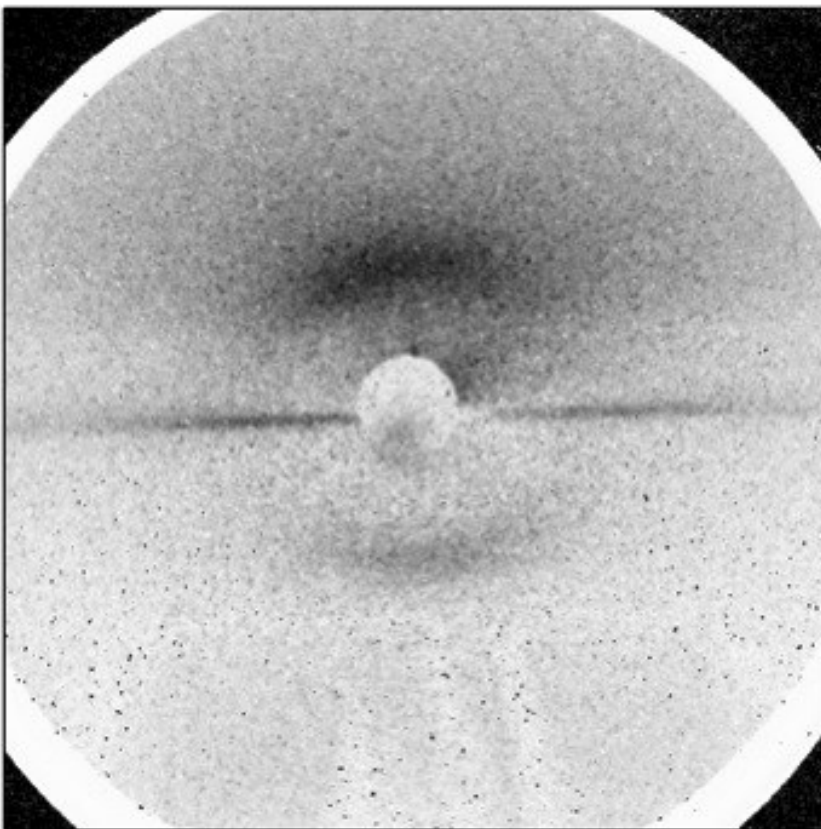

Fig. S2: Y. Takanishi

Supplement: d0sm01748e3.pdf [file d0sm01748e3.pdf]
